# Supplementary material for: ATR-FTIR Spectroscopy Combined with Multivariate Analysis Successfully Discriminates Raw Doughs and Baked 3D-Printed Snacks Enriched with Edible Insect Powder
Source: MDPI journal article supplement (doi:10.3390/foods10081806), 2021-08-05
Supplement: s1 [file s1]

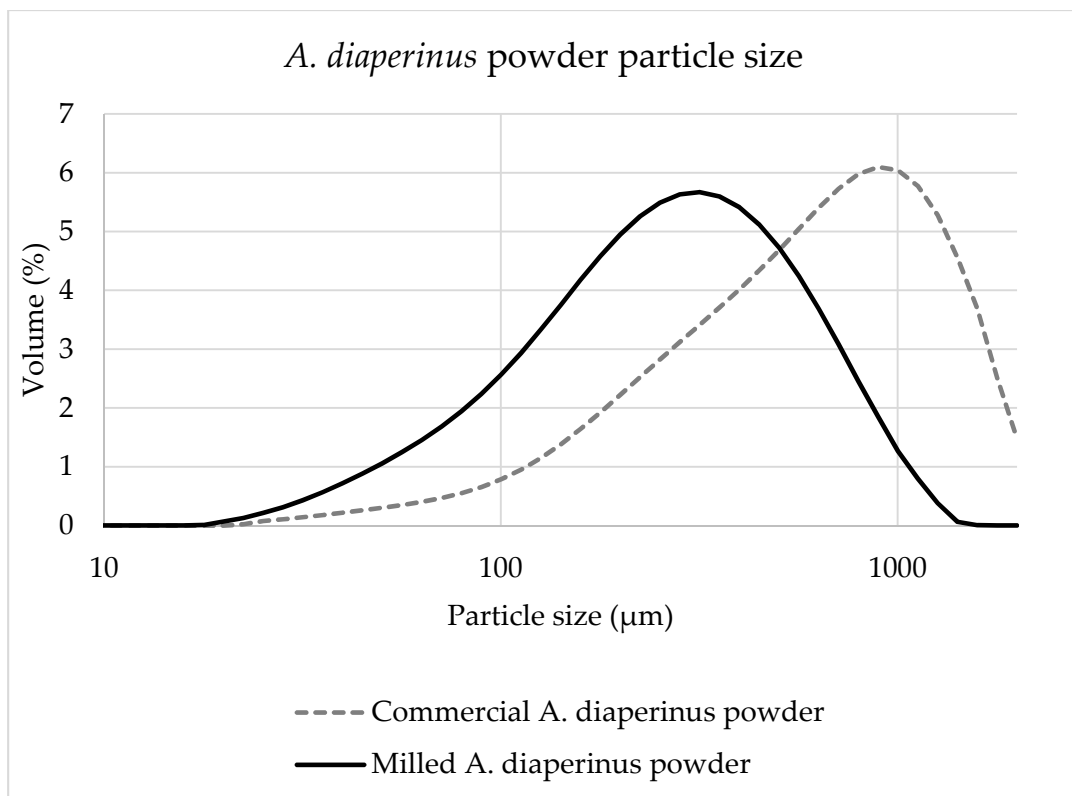

**Figure S1.** Particle size distribution of commercial and milled *A. diaperinus* powder.

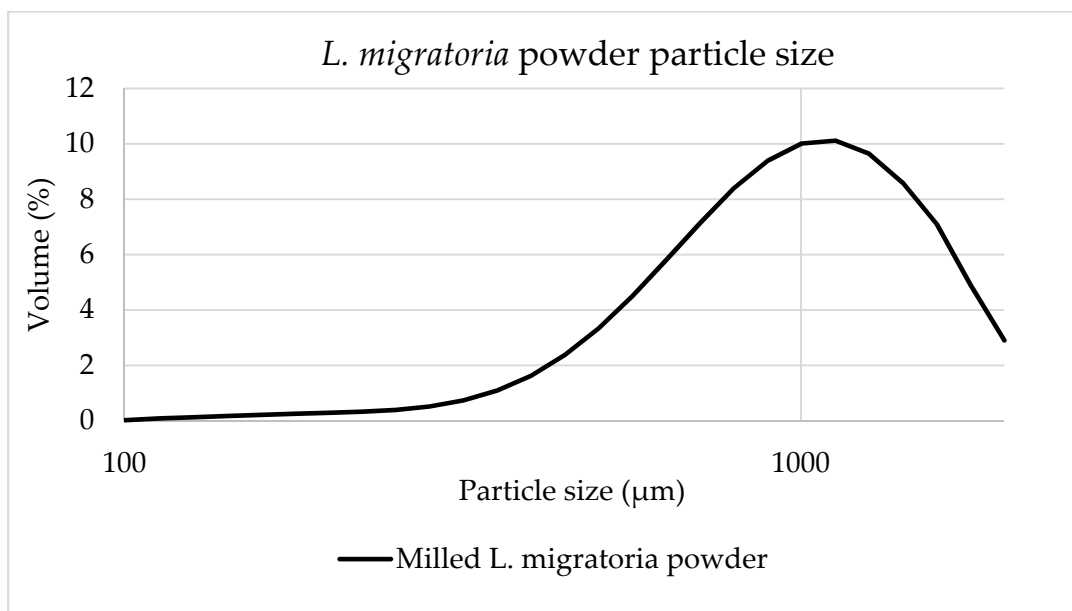

**Figure S2.** Particle size distribution of milled *L. migratoria* powder.
